# Supplementary material for: Characterisation of Non-Pathogenic Premutation-Range Myotonic Dystrophy Type 2 Alleles
Source: MDPI journal article supplement (doi:10.3390/jcm10173934), 2021-08-31
Supplement: s1 [file s1]

**Supplementary Table S1:** Inheritance of interrupted alleles – measured in lengths of the complex repeat motif. **Blue bold** numbers highlight interrupted alleles which are shared between generations in each family, while **red bold** numbers indicate uninterrupted alleles. Family DM2 is identical to Family\_2 in the manuscript, while Family\_1 is part of an extensive family marked as DM-125. **Exp**= expanded allele.

| Family identifier | Relationship | CNBP1 complex motif length (bp) |            |
|-------------------|--------------|---------------------------------|------------|
|                   |              | Allele 1                        | Allele 2   |
| DM-1              | Father       | 138                             | <b>154</b> |
| DM-1              | Mother       | <b>122</b>                      | <b>198</b> |
| DM-1              | Son          | <b>154</b>                      | <b>202</b> |
| DM-2              | Father       | 132                             | <b>134</b> |
| DM-2              | Son          | <b>134</b>                      | 152        |
| DM-2              | Son          | <b>134</b>                      | 152        |
| DM-3              | Mother       | 138                             | <b>140</b> |
| DM-3              | Daughter     | 124                             | <b>140</b> |
| DM-7              | Mother       | 134                             | <b>134</b> |
| DM-7              | Son          | 134                             | <b>134</b> |
| DM-7              | Son          | 134                             | <b>134</b> |
| DM-8              | Father       | <b>124</b>                      | 142        |
| DM-8              | Mother       | <b>132</b>                      | <b>134</b> |
| DM-8              | Son          | <b>124</b>                      | <b>134</b> |
| DM-8              | Son          | <b>124</b>                      | <b>132</b> |
| DM-10             | Father       | <b>138</b>                      | 140        |
| DM-10             | Mother       | 132                             | <b>142</b> |
| DM-10             | Daughter     | <b>138</b>                      | <b>142</b> |
| DM-11             | Father       | 140                             | <b>148</b> |
| DM-11             | Son          | 138                             | <b>148</b> |
| DM-11             | Son          | 138                             | <b>148</b> |
| DM-13             | Father       | <b>138</b>                      | 146        |
| DM-13             | Mother       | 134                             | <b>138</b> |
| DM-13             | Son          | <b>138</b>                      | <b>138</b> |
| DM-18             | Mother       | 128                             | <b>136</b> |
| DM-18             | Daughter     | <b>136</b>                      | 140        |
| DM-18             | Son          | 130                             | <b>136</b> |
| DM-20             | Father       | 128                             | <b>130</b> |
| DM-20             | Mother       | <b>132</b>                      | 138        |
| DM-20             | Son          | <b>130</b>                      | <b>132</b> |
| DM-53             | Mother       | 128                             | <b>138</b> |

|          |                                                     |     |     |
|----------|-----------------------------------------------------|-----|-----|
| DM-53    | Son                                                 | 132 | 138 |
| VKF-1    | Mother                                              | 126 | 140 |
| VKF-1    | Son                                                 | 136 | 140 |
| VKF-1    | Son                                                 | 130 | 140 |
| DM-63    | Mother                                              | 138 | Exp |
| DM-63    | Son                                                 | 136 | 138 |
| DM-63    | Daughter                                            | 136 | 138 |
| DM-101   | Father                                              | 132 | 146 |
| DM-101   | Daughter                                            | 132 | 142 |
| DM-105   | Mother                                              | 142 | 152 |
| DM-105   | Daughter                                            | 142 | Exp |
| DM-105   | Daughter                                            | 152 | Exp |
| DM-120   | Mother                                              | 132 | Exp |
| DM-120   | Daughter                                            | 128 | 132 |
| DM-122   | Mother                                              | 136 | 138 |
| DM-122   | Amniotic fluid                                      | 132 | 138 |
| DM-122   | Son                                                 | 138 | 152 |
| DM-122   | Daughter                                            | 138 | 142 |
| DM-125_1 | Mother                                              | 130 | 140 |
| DM-125_1 | Son                                                 | 126 | 140 |
| DM-125_1 | Son                                                 | 126 | 130 |
| DM-125_1 | Daughter                                            | 126 | 140 |
| DM-125_2 | Grandmother                                         | 156 | 186 |
| DM-125_2 | Daughter_1                                          | 134 | 156 |
| DM-125_2 | Grandson_1 (Son of Daughter_1)                      | 134 | 144 |
| DM-125_2 | Granddaughter_1 (Daughter of Daughter_1)            | 134 | 140 |
| DM-125_2 | Grand-granddaughter_1 (Daughter of Granddaughter_1) | 134 | 142 |
| DM-125_2 | Granddaughter_2                                     | 146 | 190 |
| DM-125_2 | Grand-grandson_2 (Son of granddoughter_2)           | 140 | 146 |
| DM-125_2 | Daughter_3                                          | 144 | 156 |
| DM-141   | Mother                                              | 132 | 140 |
| DM-141   | Son                                                 | 140 | 140 |
| DM-141   | Son                                                 | 132 | 140 |
| DM-142   | Mother                                              | 134 | 142 |
| DM-142   | Son                                                 | 132 | 142 |
| DM-150   | Father                                              | 138 | 138 |
| DM-150   | Son                                                 | 134 | 138 |

|        |                                        |     |     |
|--------|----------------------------------------|-----|-----|
| DM-166 | Mother                                 | 136 | 136 |
| DM-166 | Daughter                               | 130 | 136 |
| DM-197 | Mother                                 | 142 | 142 |
| DM-197 | Son                                    | 140 | 142 |
| DM-199 | Mother                                 | 142 | Exp |
| DM-199 | Daughter                               | 138 | 142 |
| DM-206 | Father                                 | 138 | 142 |
| DM-206 | Mother                                 | 132 | 138 |
| DM-206 | Daughter                               | 138 | 142 |
| DM-206 | Daughter                               | 132 | 138 |
| DM-242 | Mother                                 | 138 | 138 |
| DM-242 | Daughter_1                             | 138 | Exp |
| DM-242 | Granddaughter (Daughter of Daughter_1) | 136 | 138 |
| DM-242 | Son                                    | 138 | 142 |
| DM-242 | Daughter_2                             | 138 | 142 |
| DM-271 | Mother                                 | 152 | 152 |
| DM-271 | Daughter                               | 142 | 152 |

**Supplementary Table S2:** Intergenerational instability/stability of the uninterrupted *CNBP* alleles and 17 other microsatellite loci (*DMPK* and the loci included in the new European Standard Set (ESS) of loci, plus SE33) in selected family members. Results of the gender specific amelogenin and the rs1871922 genotypes are also shown. For the *CNBP1* locus uninterrupted alleles are shown in bold and are underlined, while “i” indicates interrupted alleles. “A/C” = heterozygous state without available phase information.

| Locus                | Repeat motif                                                           | Chrom.<br>position    | Family_1    |                   |            |                   | Family_2          |                   |            |                   |       |                   | Family_3 |                   |            |                   |       |                   | Family_4 |       |                         |                   |
|----------------------|------------------------------------------------------------------------|-----------------------|-------------|-------------------|------------|-------------------|-------------------|-------------------|------------|-------------------|-------|-------------------|----------|-------------------|------------|-------------------|-------|-------------------|----------|-------|-------------------------|-------------------|
|                      |                                                                        |                       | Grandmother |                   | Index case |                   | Mother            |                   | Index case |                   | Son   |                   | Mother   |                   | Index case |                   | Son   |                   | Mother   |       | Sister of<br>index case |                   |
|                      |                                                                        |                       | All.1       | All.2             | All.1      | All.2             | All.1             | All.2             | All.1      | All.2             | All.1 | All.2             | All.1    | All.2             | All.1      | All.2             | All.1 | All.2             | All.1    | All.2 | All.1                   | All.2             |
| <i>AMEL (X/Y)</i>    | -                                                                      | Xp22.1-22.3<br>Yp11.2 | X           | X                 | X          | X                 | X                 | X                 | X          | Y                 | X     | Y                 | X        | X                 | X          | X                 | X     | Y                 | X        | X     | X                       | X                 |
| <i>TH01 (TC11)</i>   | [TCAT]n                                                                | 11p15.5               | 9.3         | 9.3               | 9          | 9.3               | 8                 | 9                 | 8          | 9.3               | 9     | 9.3               | 8        | 9.3               | 8          | 9.3               | 6     | 8                 | 6        | 7     | 6                       | 9.1               |
| D3S1358              | TCTA [TCTG]n [TCTA]n                                                   | 3p25.3                | 15          | 15                | 15         | 16                | 17                | 17                | 17         | 18                | 17    | 17                | 14       | 17                | 14         | 16                | 14    | 15                | 14       | 17    | 15                      | 17                |
| vWA                  | TCTA [TCTG]n [TCTA]n                                                   | 12p13.31              | 16          | 17                | 16         | 17                | 17                | 17                | 17         | 17                | 17    | 18                | 17       | 18                | 16         | 17                | 15    | 16                | 16       | 18    | 18                      | 18                |
| D21S11               | [TCTA]n [TCTG]n<br>[TCTA]n TA [TCTA]n<br>TCA [TCTA]n TCCATA<br>[TCTA]n | 21q21.1               | 29          | 30                | 30         | 32.2              | 28                | 29                | 29         | 29                | 29    | 30                | 28       | 30                | 28         | 29                | 28    | 29                | 29       | 30    | 29                      | 32                |
| D16S539              | [GATA]n                                                                | 16q24.1               | 9           | 12                | 9          | 13                | 13                | 14                | 11         | 14                | 11    | 13                | 12       | 12                | 11         | 12                | 9     | 12                | 11       | 11    | 11                      | 14                |
| D1S1656              | [TAGA]n<br>[TGA][TAGA][TAGG]n[T<br>G]n                                 | 1q42                  | 17          | 19.3              | 15.3       | 16                | 17.3              | 18.3              | 12         | 18.3              | 16    | 18.3              | 15.3     | 16                | 15         | 16                | 16    | 17                | 16       | 17.3  | 16                      | 17.3              |
| D19S433              | AAGG [AAAG] AAGG<br>TAGG [AAGG]n                                       | 19q12                 | 13          | 13.2              | 15         | 16                | 14                | 16.2              | 16.2       | 19                | 14    | 16.2              | 6.2      | 13                | 13         | 14                | 13    | 14                | 14       | 14    | 14                      | 14                |
| <i>SE33 (ACTBP2)</i> | [AAAG]n AA [AAAG]n                                                     | 6q14.2                | 17          | 26.2              | 17         | 25.2              | 14                | 24.2              | 24.2       | 31.2              | 30.2  | 31.2              | 19       | 29.2              | 16         | 29.2              | 19    | 29.2              | 15       | 26.2  | 15                      | 17                |
| D10S1248             | [GGAA]n                                                                | 10q26.3               | 13          | 15                | 12         | 14                | 14                | 16                | 15         | 16                | 14    | 15                | 14       | 15                | 14         | 14                | 14    | 14                | 15       | 16    | 15                      | 16                |
| D22S1045             | [ATT]n ACT [ATT]n                                                      | 22q12.3               | 15          | 15                | 11         | 14                | 11                | 15                | 11         | 11                | 11    | 18                | 16       | 16                | 16         | 16                | 16    | 17                | 15       | 16    | 11                      | 15                |
| D12S391              | [AGAT]n GAT [AGAT]n<br>[AGAC]n AGAT                                    | 12p13.2               | 17          | 18                | 17         | 23                | 16                | 19                | 18         | 19                | 18    | 18                | 20       | 22                | 17         | 22                | 17    | 22                | 19       | 22    | 22                      | 22                |
| D8S1179              | [TCTA]n                                                                | 8q23.1-23.2           | 12          | 13                | 13         | 15                | 13                | 14                | 13         | 14                | 13    | 14                | 14       | 16                | 14         | 14                | 13    | 14                | 13       | 14    | 14                      | 14                |
| D2S1338              | [TGCC]n [TTCC]n                                                        | 2q35                  | 19          | 24                | 19         | 24                | 20                | 20                | 20         | 25                | 24    | 25                | 22       | 23                | 20         | 23                | 18    | 23                | 20       | 24    | 18                      | 20                |
| D2S441               | [TCTA]n                                                                | 2p14                  | 12          | 14                | 14         | 14                | 11                | 15                | 11         | 15                | 11    | 15                | 11.3     | 11.3              | 11.3       | 13                | 11    | 13                | 11       | 11    | 10                      | 11                |
| D18S51               | [AGAA]n                                                                | 18q21.3               | 14          | 15                | 15         | 17                | 13                | 14                | 14         | 15                | 13    | 14                | 14       | 14                | 14         | 15                | 12    | 15                | 14       | 18    | 17                      | 18                |
| <i>FGA (FIBRA)</i>   | [TTTC]n TTTTCT<br>[CTTT]n CTCC [TTCC]n                                 | 4q28.2                | 19          | 22                | 23         | 23                | 21                | 24                | 20         | 24                | 21    | 24                | 22       | 25                | 22         | 25                | 22    | 23                | 23       | 23    | 23                      | 24                |
| <i>DMPK</i>          | [CTG]n                                                                 | 19q13.3               | 13          | 13                | 14         | Exp               | 12                | 13                | 5          | 12                | 11    | 12                | 11       | 11                | 5          | 11                | 5     | 5                 | 13       | 14    | 5                       | 13                |
| <i>CNBP1</i>         | [CCTG]n alone                                                          | 3q21.3                | 16i         | <b><u>32</u></b>  | 15i        | <b><u>33</u></b>  | <b><u>14</u></b>  | <b><u>33</u></b>  | 18i        | <b><u>34</u></b>  | 15i   | <b><u>35</u></b>  | 15i      | <b><u>37</u></b>  | 15i        | <b><u>37</u></b>  | 15i   | <b><u>36</u></b>  | 15i      | 15i   | 15i                     | <b><u>42</u></b>  |
| <i>CNBP1</i>         | [TG]n [TCTG]n [CCTG]n                                                  | 3q21.3                | 156         | <b><u>186</u></b> | 146        | <b><u>190</u></b> | <b><u>122</u></b> | <b><u>198</u></b> | 154        | <b><u>202</u></b> | 134   | <b><u>206</u></b> | 140      | <b><u>208</u></b> | 142        | <b><u>208</u></b> | 142   | <b><u>204</u></b> | 132      | 136   | 136                     | <b><u>226</u></b> |
| rs1871922            | C or A                                                                 | 3q21.3                | A/C         |                   | A/C        |                   | C                 | C                 | A          | C                 | A     | <b>C</b>          | A/C      |                   | A/C        |                   | A/C   |                   | C        | C     | C                       | C                 |

**Supplementary Table S3:** Time dependent somatic instability/stability of the uninterrupted *CNBP* alleles and 17 other microsatellite loci (*DMPK* and the loci included in the new European Standard Set (ESS) of loci, plus SE33) in selected family members. Uninterrupted alleles are shown in bold. Results of the gender specific amelogenin and the rs1871922 genotypes are also shown. For the *CNBP1* locus uninterrupted alleles are shown in bold and are underlined, while “i” indicates interrupted alleles.

| Locus                       | Repeat motif                                                                                                                          | Chrom.<br>position    | Family_2              |                       | Family_4                         |                                  |
|-----------------------------|---------------------------------------------------------------------------------------------------------------------------------------|-----------------------|-----------------------|-----------------------|----------------------------------|----------------------------------|
|                             |                                                                                                                                       |                       | Index case<br>(26yrs) | Index case<br>(43yrs) | Sister of index<br>case (24 yrs) | Sister of index<br>case (40 yrs) |
| <i>AMEL</i> (X/Y)           | -                                                                                                                                     | Xp22.1-22.3<br>Yp11.2 | X Y                   | X Y                   | X X                              | X X                              |
| <i>TH01</i> ( <i>TC11</i> ) | [TCAT] <sub>n</sub>                                                                                                                   | 11p15.5               | 8 9.3                 | 8 9.3                 | 6 9.1                            | 6 9.1                            |
| D3S1358                     | TCTA [TCTG] <sub>n</sub> [TCTA] <sub>n</sub>                                                                                          | 3p25.3                | 17 18                 | 17 18                 | 15 17                            | 15 17                            |
| vWA                         | TCTA [TCTG] <sub>n</sub> [TCTA] <sub>n</sub>                                                                                          | 12p13.31              | 17 17                 | 17 17                 | 18 18                            | 18 18                            |
| D21S11                      | [TCTA] <sub>n</sub> [TCTG] <sub>n</sub> [TCTA] <sub>n</sub> TA [TCTA] <sub>n</sub> TCA [TCTA] <sub>n</sub> TCCATA [TCTA] <sub>n</sub> | 21q21.1               | 29 29                 | 29 29                 | 29 32                            | 29 32                            |
| D16S539                     | [GATA] <sub>n</sub>                                                                                                                   | 16q24.1               | 11 14                 | 11 14                 | 11 14                            | 11 14                            |
| D1S1656                     | [TAGA] <sub>n</sub> [TGA][TAGA][TAGG] <sub>n</sub> [TG] <sub>n</sub>                                                                  | 1q42                  | 12 18.3               | 12 18.3               | 16 17.3                          | 16 17.3                          |
| D19S433                     | AAGG [AAAG] AAGG TAGG [AAGG] <sub>n</sub>                                                                                             | 19q12                 | 16.2 19               | 16.2 19               | 14 14                            | 14 14                            |
| SE33<br>( <i>ACTBP2</i> )   | [AAAG] <sub>n</sub> AA [AAAG] <sub>n</sub>                                                                                            | 6q14.2                | 24.2 31.2             | 24.2 31.2             | 15 17                            | 15 17                            |
| D10S1248                    | [GGAA] <sub>n</sub>                                                                                                                   | 10q26.3               | 15 16                 | 15 16                 | 15 16                            | 15 16                            |
| D22S1045                    | [ATT] <sub>n</sub> ACT [ATT] <sub>n</sub>                                                                                             | 22q12.3               | 11 11                 | 11 11                 | 11 15                            | 11 15                            |
| D12S391                     | [AGAT] <sub>n</sub> GAT [AGAT] <sub>n</sub> [AGAC] <sub>n</sub> AGAT                                                                  | 12p13.2               | 18 19                 | 18 19                 | 22 22                            | 22 22                            |
| D8S1179                     | [TCTA] <sub>n</sub>                                                                                                                   | 8q23.1-<br>23.2       | 13 14                 | 13 14                 | 14 14                            | 14 14                            |
| D2S1338                     | [TGCC] <sub>n</sub> [TTCC] <sub>n</sub>                                                                                               | 2q35                  | 20 25                 | 20 25                 | 18 20                            | 18 20                            |
| D2S441                      | [TCTA] <sub>n</sub>                                                                                                                   | 2p14                  | 11 15                 | 11 15                 | 10 11                            | 10 11                            |
| D18S51                      | [AGAA] <sub>n</sub>                                                                                                                   | 18q21.3               | 14 15                 | 14 15                 | 17 18                            | 17 18                            |
| <i>FGA</i> ( <i>FIBRA</i> ) | [TTTC] <sub>n</sub> TTTTCT [CTTT] <sub>n</sub> CTCC [TTCC] <sub>n</sub>                                                               | 4q28.2                | 20 24                 | 20 24                 | 23 24                            | 23 24                            |
| <i>DMPK</i>                 | [CTG] <sub>n</sub>                                                                                                                    | 19q13.3               | 5 12                  | 5 12                  | 5 13                             | 5 13                             |
| <i>CNBP1</i>                | [CCTG] <sub>n</sub> alone                                                                                                             | 3q21.3                | 18i <b>34</b>         | 18i <b>34</b>         | 15i <b>42</b>                    | 15i <b>43</b>                    |
| <i>CNBP1</i>                | [TG] <sub>n</sub> [TCTG] <sub>n</sub> [CCTG] <sub>n</sub>                                                                             | 3q21.3                | 154 <b><u>202</u></b> | 154 <b><u>202</u></b> | 136 <b><u>226</u></b>            | 136 <b><u>230</u></b>            |
